# Supplementary material
Source: bioRxiv or medRxiv preprint supplement (https://www.medrxiv.org/highwire/filestream/69773/field_highwire_adjunct_files/0/19010140-1.pdf)
Supplement: Supplementary file [file 19010140-1.pdf]

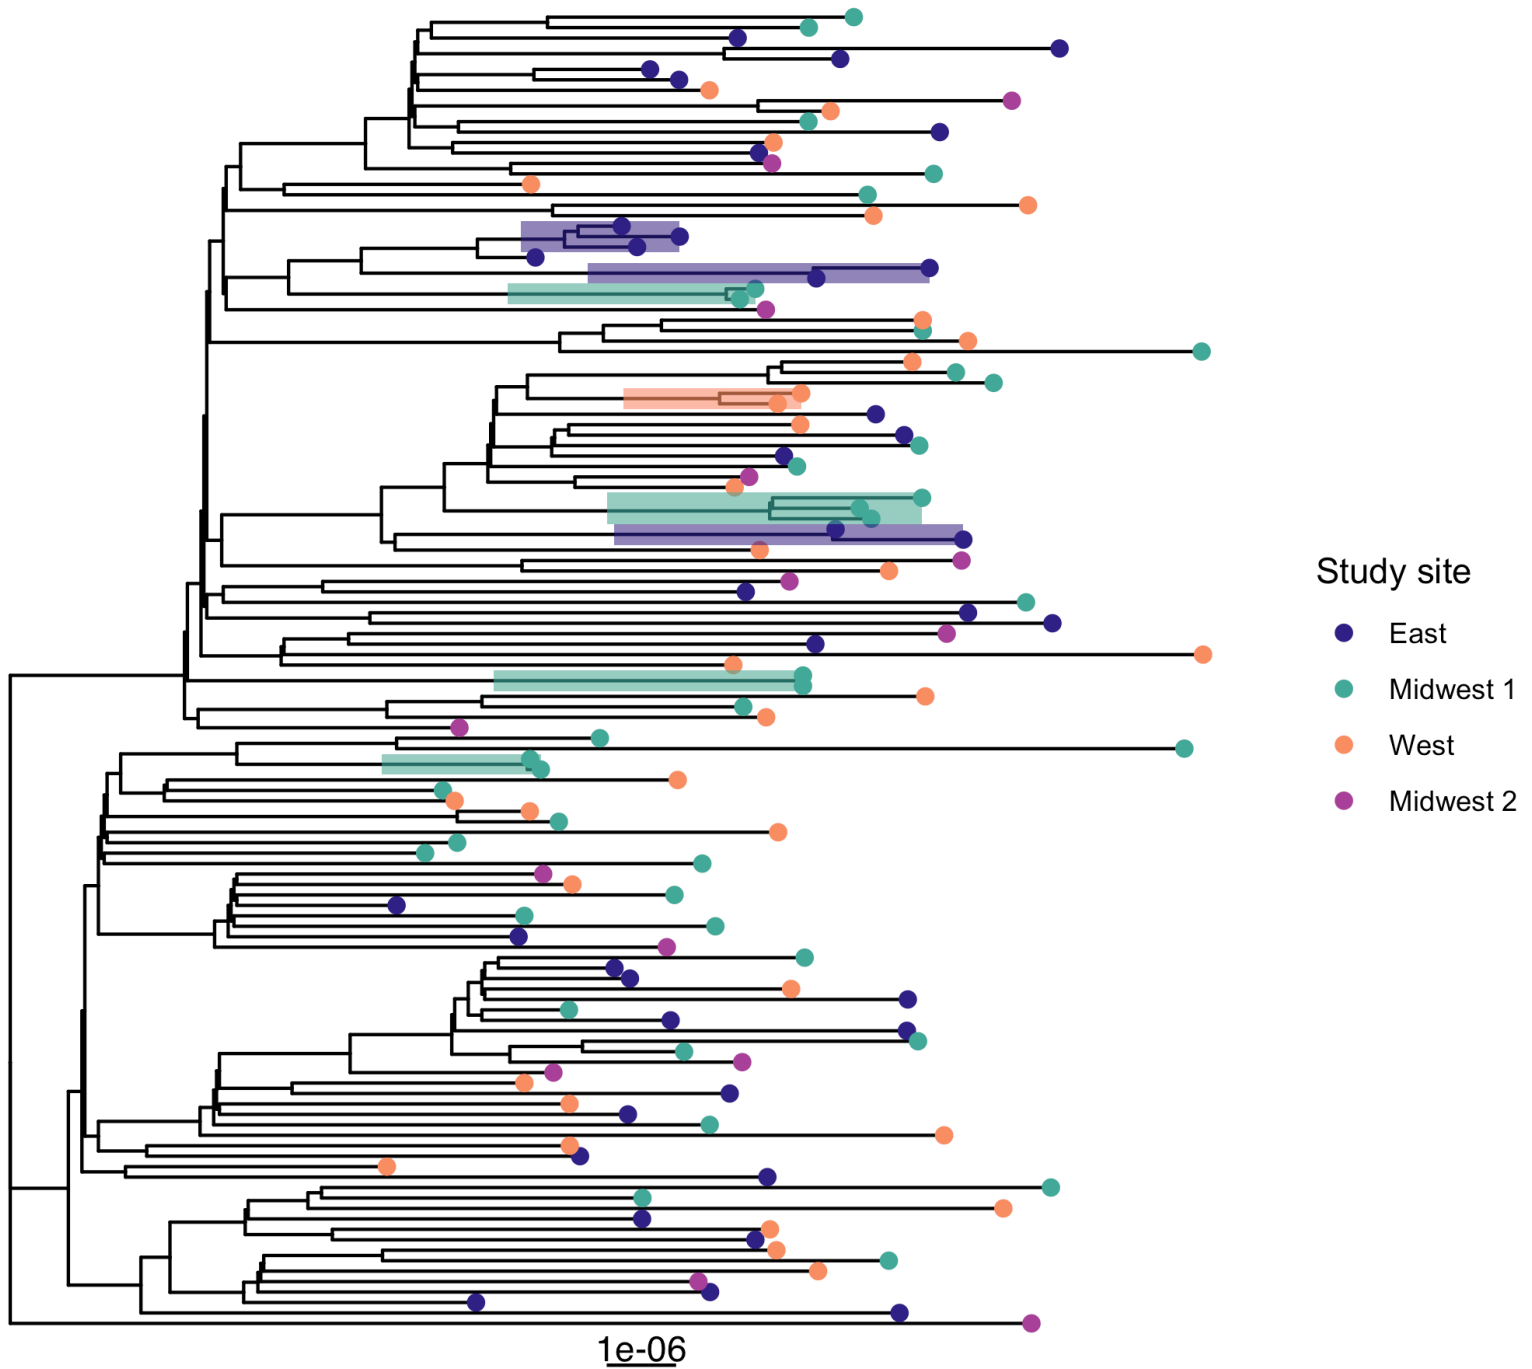

**Supplementary Figure 1: Maximum-likelihood phylogeny of all 126 ST131-H30 isolates with the tips colored by study site and the 8 identified putative transmission clusters highlighted**
